# Supplementary material
Source: publisher figshare collection journal article supplement (https://karger.figshare.com/ndownloader/files/8260685)
Supplement: Supplementary file 1 [file 8260685]

## Sheet: Supp table
Patterns of microglial cell activation in Alzheimer´s disease and Frontotemporal lobar degeneration (FTLD-TDP)
Ricardo Taipa1,2,3, Paulo Brochado1, Andrew Robinson4, Inês Reis1, Patricio Costa2,3, David M Mann4, Manuel Melo Pires1, Nuno Sousa2,3
1 - Neuropathology Unit, Neuroscience Department, Centro Hospitalar do Porto, Portugal
2 - Life and Health Sciences Research Institute, University of Minho, Portugal
3 - ICVS/3B’s Associate Lab, PT Government Associated Lab, Braga/Guimarães, Portugal
4 - Clinical and Cognitive Neuroscience Research Group, University of Manchester, Salford Royal Foundation NHS Trust, UK
Journal of Neurodegenerative Diseases
Supp Table 1 - Clinical/demographic characteristics and microglial scores
Case ID#	Pathological diagnosis	Gender	Braak stage	PMD	Age Onset	Age Death	Duration	CA1	CA2_3	CA4	DG_GCL	DG_ML	SUB	HIP_WM	EC	EWM	TC	TWM	FC	FWM	PC	PCWM	OC	OWM
02/02	AD	M	V-VI	na	58	68	10	2	1	1	1	1	2	3	3	3	3	3	2	2	0	0	2	2
03/13	AD	M	VI	na	58	70	12	2	1	1	1	1	3	2	2	2	2	3	2	2	1	1	2	3
04/06	AD	M	V-VI	na	54	59	5	1	0	1	0	0	1	1	1	2	1	1	0	0	NA	NA	0	0
06/01	AD	M	V	na	53	66	13	0	0	0	0	0	1	1	1	1	1	1	1	1	2	2	1	2
09/01	AD	M	VI	96	59	69	10	3	1	1	1	2	4	3	2	3	2	2	1	2	2	3	2	2
09/09	AD	M	VI	na	55	65	10	2	2	2	1	2	3	2	3	3	4	2	1	1	1	1	2	1
09/12	AD	F	VI	130	54	61	7	1	1	1	1	2	2	1	2	2	2	2	1	1	1	0	1	1
09/17	AD	M	V-VI	na	71	76	5	1	1	1	0	1	2	2	2	3	2	2	0	1	0	0	1	2
10/09	AD	M	V-VI	96	57	66	9	4	4	3	1	3	3	4	4	3	4	3	3	3	3	2	3	3
10/10	AD	M	VI	96	75	82	7	3	1	1	1	1	2	2	3	2	2	2	3	2	1	1	3	2
10/33	AD	M	V-VI	61.75	52	65	13	4	3	4	1	3	4	3	3	4	4	3	3	3	3	3	1	2
11/02	AD	M	V-VI	131	63	70	7	4	2	4	1	4	4	3	4	4	4	3	3	2	2	1	3	2
11/16	AD	M	V-VI	75	55	64	9	2	1	1	1	1	3	1	2	3	NA	NA	2	2	2	2	1	1
11/28	AD	F	VI	64	64	71	7	4	3	3	2	2	3	4	3	3	4	4	3	3	3	3	2	2
12/05	AD	M	VI	107	64	73	9	3	NA	3	2	2	4	3	3	3	3	3	2	3	3	3	2	2
			MEAN		59.4667	68.3333	8.86667	2.4	1.5	1.8	0.933333	1.66667	2.73333	2.33333	2.53333	2.73333	2.71429	2.42857	1.8	1.86667	1.71429	1.57143	1.73333	1.8
			SD		6.73866	5.8146	2.55976	1.29835	1.16024	1.26491	0.593617	1.1127	1.0328	1.04654	0.915475	0.798809	1.13873	0.851631	1.08233	0.915475	1.06904	1.15787	0.883715	0.774597
			MAX		75	82	13	4	4	4	2	4	4	4	4	4	4	4	3	3	3	3	3	3
			MIN		52	59	5	0	0	0	0	0	1	1	1	1	1	1	0	0	0	0	0	0
92/114	FTLD-TDP A	M	na	na	49	58	9	2	1	1	0	0	2	2	1	NA	2	3	2	3	0	0	0	0
98/02	FTLD-TDP A	M	na	na	60	68	8	2	NA	1	0	1	2	3	NA	NA	1	NA	2	1	0	0	0	0
01/06	FTLD-TDP A	M	na	na	59	64	5	2	2	2	2	1	3	3	1	2	1	2	1	2	1	0	0	0
05/04	FTLD-TDP A	M	na	na	69	75	6	1	1	0	0	0	NA	2	1	2	1	2	1	2	1	1	1	0
06/10	FTLD-TDP A	M	na	na	54	66	12	1	0	0	0	0	2	2	0	1	0	1	2	3	0	0	0	0
08/34	FTLD-TDP A	M	na	na	64	72	8	2	2	1	1	0	3	2	2	2	2	2	2	3	1	2	1	2
09/02	FTLD-TDP A	F	na	45.5	66	72	6	1	1	1	0	1	2	2	2	3	NA	NA	1	2	1	1	0	1
09/29	FTLD-TDP A	M	na	96	78	82	4	2	1	2	1	1	3	2	2	2	2	2	2	3	1	2	2	2
12/13	FTLD-TDP A	M	na	94.5	63	65	2	4	2	3	2	2	4	4	4	3	3	4	4	4	2	2	3	2
13/26	FTLD-TDP A	M	na	81	54	65	11	1	2	2	1	1	3	3	3	4	2	3	2	3	2	3	2	2
A12/086	FTLD-TDP B	M	0-I	na	60	63	3	2	2	2	2	1	2	3	3	4	2	3	2	3	3	3	1	2
A11/33	FTLD-TDP A	M	0	< 24	54	61	7	2	1	1	1	1	2	4	3	4	2	3	3	4	3	4	3	4
BC109	FTLD-TDP C	F	I	6	65	78	13	2	2	2	2	1	3	3	2	3	2	3	4	3	3	3	2	3
			MEAN		61.1538	68.3846	7.23077	1.84615	1.41667	1.38462	0.923077	0.769231	2.58333	2.69231	2	2.72727	1.66667	2.54545	2.15385	2.76923	1.38462	1.61538	1.15385	1.38462
			SD		7.65774	6.9945	3.39494	0.800641	0.668558	0.869718	0.862316	0.599145	0.668558	0.751068	1.12815	1.00905	0.778499	0.8202	0.987096	0.83205	1.1209	1.38675	1.14354	1.3253
			MAX		78	82	13	4	2	3	2	2	4	4	4	4	3	4	4	4	3	4	3	4
			MIN		49	58	2	1	0	0	0	0	2	2	0	1	0	1	1	1	0	0	0	0
06/03	CONTROL	F	IV	na		81		2	2	1	1	1	2	2	2	2	3	3	2	3	1	1	2	2
06/08	CONTROL	F	IV-V	na		79		1	1	2	1	1	2	1	2	2	2	2	0	1	1	1	1	2
08/04	CONTROL	F	I-II	72		75		2	1	1	0	1	2	2	2	3	1	2	1	2	1	1	1	1
09/26	CONTROL	M	I-II	12		85		1	NA	1	1	0	2	2	2	2	1	2	0	1	0	2	1	2
12/16	CONTROL	F	0	92.5		53		2	1	1	1	1	2	1	2	2	2	2	1	2	2	2	1	2
NP161/12	CONTROL	M	I-II	48		69		2	2	2	1	2	2	2	2	2	1	2	1	1	1	2	1	2
NP012/13	CONTROL	F	I-II	48		60		2	1	2	1	1	2	2	1	2	2	2	1	2	2	2	2	2
NP017/13	CONTROL	F	I-II	48		69		1	2	2	1	1	2	3	2	3	1	3	1	2	1	2	1	3
NP094/12	CONTROL	M	I	24		63		2	2	2	1	2	2	2	1	2	1	2	1	2	1	2	2	3
NP085/12	CONTROL	F	I	51		71		1	1	1	1	2	2	2	1	2	2	2	1	2	2	2	2	3
NP083/12	CONTROL	F	0	60		62		1	2	2	1	2	2	2	2	2	2	2	2	3	2	2	2	2
00/1078	CONTROL	M	III	23		77		1	1	2	1	2	2	2	2	3	2	2	2	2	2	3	2	2
00/1093	CONTROL	F	0-I	21		80		1	1	2	0	2	1	2	2	2	1	2	2	2	2	2	2	2
01/083	CONTROL	F	I-II	29		79		1	1	2	1	1	2	2	1	2	1	2	2	2	2	2	1	2
00/1050	CONTROL	F	0	48		81		1	1	1	0	1	1	1	1	2	1	1	1	1	1	1	2	2
NP128/13	CONTROL	M	0	48		68		2	2	2	1	2	2	2	3	2	2	2	2	2	2	2	2	2
NP126/13	CONTROL	M	I	38		56		1	1	1	0	2	1	1	1	2	1	1	1	2	1	2	1	3
NP073/13	CONTROL	M	I-II	24		59		2	1	2	1	2	2	2	2	2	2	2	2	2	2	3	1	2
			MEAN			70.3889		1.44444	1.35294	1.61111	0.777778	1.44444	1.83333	1.83333	1.72222	2.16667	1.55556	2	1.27778	1.88889	1.44444	1.88889	1.5	2.16667
			SD			9.78077		0.51131	0.492592	0.501631	0.427793	0.615699	0.383482	0.514496	0.574513	0.383482	0.615699	0.485071	0.669113	0.582983	0.615699	0.582983	0.514496	0.514496
			MAX			85		2	2	2	1	2	2	3	3	3	3	3	2	3	2	3	2	3
			MIN			53		1	1	1	0	0	1	1	1	2	1	1	0	1	0	1	1	1
